# Supplementary material for: Use of Early Ketamine Sedation and Association With Clinical and Cost Outcomes Among Mechanically Ventilated Patients With COVID-19: A Retrospective Cohort Study
Source: PubMed Central journal article supplement — Crit Care Explor. 2024 Jun 21;6(7):e1105. doi: 10.1097/CCE.0000000000001105 (PMC11196078; doi:10.1097/cce.0000000000001105), 2024-06-21
Supplement: cc9-6-e1105-s001.pdf [file cc9-6-e1105-s001.pdf]

**Title: Use of Early Ketamine Sedation and Association with Clinical and Cost Outcomes among Mechanically Ventilated Patients with Covid-19: A Retrospective Cohort Study**

**Authors:** Galen Royce-Nagel, M.D.<sup>1,2</sup>, Mary Jarzebowski M.D.<sup>5</sup>, Pattrapun Wongsripuemtet, M.D.<sup>1,4</sup>, Vijay Krishnamoorthy, M.D., MPH, PhD<sup>1,2</sup>, Matthew Fuller, MS.<sup>1,2</sup>, Tetsu Ohnuma, M.D., MPH, PhD.<sup>1,2</sup>, Miriam Treggiari, M.D., MPH, PhD<sup>1,2</sup>, Miguel Yaport, M.D.<sup>1,2</sup>, Julien Cobert, M.D.<sup>6</sup>, Ethan Garrigan, M.D., MPA<sup>1,2</sup>, Raquel Bartz, M.D., MMCi, MHA<sup>7</sup>, Karthik Raghunathan, M.D., MPH<sup>1,2,\*</sup>

<sup>1</sup>Critical Care and Perioperative Population Health Research (CAPER) Unit, Department of Anesthesiology, Duke University, Durham, NC., USA

<sup>2</sup>Duke University School of Medicine, Durham, NC., USA

<sup>3</sup>Department of Health Science, Duke University. Durham, NC, USA

<sup>4</sup>Department of Anesthesiology, Faculty of Medicine, Siriraj Hospital, Bangkok, Thailand

<sup>5</sup>Department of Anesthesiology, University of Michigan, Ann Arbor, MI, USA

<sup>6</sup>Department of Anesthesiology, University of California, San Francisco, CA, USA

<sup>7</sup>Department of Anesthesiology, Brigham and Women's Hospital, Boston, MA, USA

\*Corresponding author Tetsu Ohnuma, MD, M.P.H

Email [tetsu.ohnuma@duke.edu](mailto:tetsu.ohnuma@duke.edu)

Phone +1(919)869-0299

## Table of Contents

|                                                                                                            | Page |
|------------------------------------------------------------------------------------------------------------|------|
| Supplemental Table 1 Cohort Demographic Characteristics Before and After Propensity Score Matched Analysis | 3    |
| Supplemental Figure 1 Survival Curve (% patients alive each day after day 2)                               | 8    |
| Supplemental Figure 2 Length of Stay Among Survivors and Non-survivors                                     | 9    |

**Supplemental Table 1 Cohort Demographic Characteristics Before and After Propensity Score Matched Analysis**

| Variables              | Before Matching                               |                                             | Standardized Difference | After Matching                                |                                              | Standardized Difference |
|------------------------|-----------------------------------------------|---------------------------------------------|-------------------------|-----------------------------------------------|----------------------------------------------|-------------------------|
|                        | Ketamine Group<br>(n=1423)<br>patients,<br>N% | Other Group<br>(n=41531)<br>patients,<br>N% |                         | Ketamine Group<br>(n=1390)<br>patients,<br>N% | Matched Group<br>(n=1390)<br>patients,<br>N% |                         |
| <b>Demographics</b>    |                                               |                                             |                         |                                               |                                              |                         |
| <b>Age (mean, IQR)</b> | 59 [48, 68]                                   | 65 [55, 74]                                 | 0.36                    | 59 [49, 68]                                   | 59 [49, 68]                                  | 0.01                    |
| <b>Sex</b>             |                                               |                                             | 0.08                    |                                               |                                              | 0.03                    |
| Female                 | 505<br>(35.5%)                                | 16578<br>(39.9%)                            |                         | 492<br>(35.4%)                                | 472<br>(34.0%)                               |                         |
| Male                   | 918<br>(64.5%)                                | 24939<br>(60.0%)                            |                         | 898<br>(64.6%)                                | 918<br>(66.0%)                               |                         |
| Unknown                | 0 (0.0%)                                      | 14 (0.0%)                                   |                         |                                               |                                              |                         |
| <b>Race</b>            |                                               |                                             | 0.25                    |                                               |                                              | 0.04                    |
| Asian                  | 39 (2.7%)                                     | 1168<br>(2.8%)                              |                         | 37 (2.7%)                                     | 46 (3.3%)                                    |                         |
| Black                  | 220<br>(15.5%)                                | 7611<br>(18.3%)                             |                         | 215<br>(15.5%)                                | 220<br>(15.8%)                               |                         |
| Other                  | 277<br>(19.5%)                                | 5110<br>(12.3%)                             |                         | 266<br>(19.1%)                                | 268<br>(19.3%)                               |                         |
| Unknown                | 111 (7.8%)                                    | 2094<br>(5.0%)                              |                         | 111 (8.0%)                                    | 100 (7.2%)                                   |                         |
| White                  | 776<br>(54.5%)                                | 25548<br>(61.5%)                            |                         | 761<br>(54.7%)                                | 756<br>(54.4%)                               |                         |
| <b>Ethnicity</b>       |                                               |                                             | 0.18                    |                                               |                                              | 0.03                    |
| Hispanic               | 342<br>(24.0%)                                | 6938<br>(16.7%)                             |                         | 330<br>(23.7%)                                | 341<br>(24.5%)                               |                         |
| Non-Hispanic           | 804<br>(56.5%)                                | 26630<br>(64.1%)                            |                         | 787<br>(56.6%)                                | 789<br>(56.8%)                               |                         |
| Unknown                | 277<br>(19.5%)                                | 7963<br>(19.2%)                             |                         | 273<br>(19.6%)                                | 260<br>(18.7%)                               |                         |
| <b>Payor Category</b>  |                                               |                                             | 0.40                    |                                               |                                              | 0.04                    |
| Managed Care           | 364<br>(25.6%)                                | 5833<br>(14.0%)                             |                         | 351<br>(25.3%)                                | 338<br>(24.3%)                               |                         |
| Medicaid               | 256<br>(18.0%)                                | 6516<br>(15.7%)                             |                         | 249<br>(17.9%)                                | 255<br>(18.3%)                               |                         |
| Medicare               | 527<br>(37.0%)                                | 22882<br>(55.1%)                            |                         | 520<br>(37.4%)                                | 537<br>(38.6%)                               |                         |
| Other                  | 276<br>(19.4%)                                | 6300<br>(15.2%)                             |                         | 270<br>(19.4%)                                | 260<br>(18.7%)                               |                         |
| <b>Discharge Month</b> |                                               |                                             | 0.05                    |                                               |                                              | 0.02                    |
| April 2020             | 163<br>(11.5%)                                | 4702<br>(11.3%)                             |                         | 159<br>(11.4%)                                | 160<br>(11.5%)                               |                         |

|                                 |                |                  |                |                |     |
|---------------------------------|----------------|------------------|----------------|----------------|-----|
| May 2020                        | 162<br>(11.4%) | 3057<br>(7.4%)   | 161<br>(11.6%) | 149<br>(10.7%) |     |
| June 2020                       | 88 (6.2%)      | 1739<br>(4.2%)   | 82 (5.9%)      | 74 (5.3%)      |     |
| July 2020                       | 79 (5.6%)      | 2523<br>(6.1%)   | 77 (5.5%)      | 77 (5.5%)      |     |
| August 2020                     | 78 (5.5%)      | 2439<br>(5.9%)   | 78 (5.6%)      | 73 (5.3%)      |     |
| September 2020                  | 54 (3.8%)      | 1721<br>(4.1%)   | 54 (3.9%)      | 60 (4.3%)      |     |
| October 2020                    | 71 (5.0%)      | 1793<br>(4.3%)   | 70 (5.0%)      | 74 (5.3%)      |     |
| November 2020                   | 107 (7.5%)     | 3065<br>(7.4%)   | 104 (7.5%)     | 105 (7.6%)     |     |
| December 2020                   | 137 (9.6%)     | 5489<br>(13.2%)  | 135 (9.7%)     | 142<br>(10.2%) |     |
| January 2021                    | 126 (8.9%)     | 5710<br>(13.7%)  | 124 (8.9%)     | 113 (8.1%)     |     |
| February 2021                   | 110 (7.7%)     | 3429<br>(8.3%)   | 106 (7.6%)     | 115 (8.3%)     |     |
| March 2021                      | 59 (4.1%)      | 1960<br>(4.7%)   | 58 (4.2%)      | 54 (3.9%)      |     |
| April 2021                      | 65 (4.6%)      | 1644<br>(4.0%)   | 64 (4.6%)      | 73 (5.3%)      |     |
| May 2021                        | 76 (5.3%)      | 1418<br>(3.4%)   | 74 (5.3%)      | 72 (5.2%)      |     |
| June 2021                       | 48 (3.4%)      | 842 (2.0%)       | 44 (3.2%)      | 49 (3.5%)      |     |
| <b>Hospital Characteristics</b> |                |                  |                |                |     |
| <b>Bed Count</b>                |                |                  | 0.39           |                | N/A |
| 000-099                         | 15 (1.1%)      | 1338<br>(3.2%)   | 12 (0.9%)      | 12 (0.9%)      |     |
| 100-199                         | 73 (5.1%)      | 4970<br>(12.0%)  | 70 (5.0%)      | 70 (5.0%)      |     |
| 200-299                         | 139 (9.8%)     | 6692<br>(16.1%)  | 136 (9.8%)     | 136 (9.8%)     |     |
| 300-399                         | 276<br>(19.4%) | 8054<br>(19.4%)  | 257<br>(18.5%) | 257<br>(18.5%) |     |
| 400-499                         | 219<br>(15.4%) | 4967<br>(12.0%)  | 219<br>(15.8%) | 219<br>(15.8%) |     |
| 500+                            | 701<br>(49.3%) | 15510<br>(37.3%) | 696<br>(50.1%) | 696<br>(50.1%) |     |
| <b>Provider Region</b>          |                |                  |                |                |     |
|                                 |                |                  | 0.32           |                | N/A |
| Midwest                         | 285<br>(20.0%) | 9710<br>(23.4%)  | 280<br>(20.1%) | 280<br>(20.1%) |     |
| Northeast                       | 222<br>(15.6%) | 5920<br>(14.3%)  | 217<br>(15.6%) | 217<br>(15.6%) |     |
| South                           | 789<br>(55.4%) | 18136<br>(43.7%) | 768<br>(55.3%) | 768<br>(55.3%) |     |

|                                               |                 |                  |       |                 |                 |      |
|-----------------------------------------------|-----------------|------------------|-------|-----------------|-----------------|------|
| West                                          | 127 (8.9%)      | 7765<br>(18.7%)  |       | 125 (9.0%)      | 125 (9.0%)      |      |
| <b>Setting</b>                                |                 |                  | 0.14  |                 |                 | N/A  |
| Rural                                         | 94 (6.6%)       | 4311<br>(10.4%)  |       | 91 (6.5%)       | 91 (6.5%)       |      |
| Urban                                         | 1329<br>(93.4%) | 37220<br>(89.6%) |       | 1299<br>(93.5%) | 1299<br>(93.5%) |      |
| <b>Teaching Status</b>                        |                 |                  | 0.25  |                 |                 | N/A  |
| Non-teaching                                  | 490<br>(34.4%)  | 19430<br>(46.8%) |       | 466<br>(33.5%)  | 466<br>(33.5%)  |      |
| Teaching                                      | 933<br>(65.6%)  | 22101<br>(53.2%) |       | 924<br>(66.5%)  | 924<br>(66.5%)  |      |
| <b>Admission Source</b>                       |                 |                  |       |                 |                 |      |
| Transfer from a hospital (different facility) | 423<br>(29.7%)  | 7809<br>(18.8%)  |       | 415<br>(29.9%)  | 423<br>(30.4%)  |      |
| <b>Comorbidity</b>                            |                 |                  |       |                 |                 |      |
| van Walraven Score (mean, IQR <sup>a</sup> )  | 5 [0, 10]       | 6 [1, 12]        | 0.24  |                 |                 |      |
| Congestive heart failure                      | 233<br>(16.4%)  | 9958<br>(24.0%)  | 0.17  | 230<br>(16.5%)  | 239<br>(17.2%)  | 0.02 |
| Valvular disease                              | 32 (2.2%)       | 2241<br>(5.4%)   | 0.15  | 32 (2.3%)       | 34 (2.4%)       | 0.01 |
| Pulmonary circulation disease                 | 61 (4.3%)       | 1577<br>(3.8%)   | 0.02  | 61 (4.4%)       | 68 (4.9%)       | 0.02 |
| Peripheral vascular disease                   | 47 (3.3%)       | 2065<br>(5.0%)   | 0.07  | 47 (3.4%)       | 52 (3.7%)       | 0.02 |
| Paralysis                                     | 66 (4.6%)       | 1627<br>(3.9%)   | 0.01  | 60 (4.3%)       | 71 (5.1%)       | 0.04 |
| Other neurological disorders                  | 116 (8.2%)      | 5302<br>(12.8%)  | 0.15  | 116 (8.3%)      | 129 (9.3%)      | 0.03 |
| Chronic pulmonary disease                     | 358<br>(25.2%)  | 11088<br>(26.7%) | 0.02  | 351<br>(25.3%)  | 339<br>(24.4%)  | 0.02 |
| Diabetes without chronic complications        | 160<br>(11.2%)  | 4638<br>(11.2%)  | <0.01 | 156<br>(11.2%)  | 170<br>(12.2%)  | 0.03 |
| Diabetes with chronic complications           | 474<br>(33.3%)  | 16006<br>(38.5%) | 0.10  | 466<br>(33.5%)  | 455<br>(32.7%)  | 0.02 |
| Hypothyroidism                                | 186<br>(13.1%)  | 6119<br>(14.7%)  | 0.03  | 181<br>(13.0%)  | 186<br>(13.4%)  | 0.01 |
| Renal failure                                 | 185<br>(13.0%)  | 8243<br>(19.8%)  | 0.18  | 184<br>(13.2%)  | 175<br>(12.6%)  | 0.02 |
| Liver disease                                 | 119 (8.4%)      | 3099<br>(7.5%)   | 0.02  | 116 (8.3%)      | 133 (9.6%)      | 0.04 |
| Peptic ulcer Disease with bleeding            | 5 (0.4%)        | 491 (1.2%)       | 0.10  | 4 (0.3%)        | 7 (0.5%)        | 0.02 |

|                                                     |              |               |       |             |             |       |
|-----------------------------------------------------|--------------|---------------|-------|-------------|-------------|-------|
| Acquired immune deficiency syndrome                 | 1 (0.1%)     | 29 (0.1%)     | <0.01 | 1 (0.1%)    | 1 (0.1%)    | 0     |
| Lymphoma                                            | 10 (0.7%)    | 316 (0.8%)    | 0.01  | 10 (0.7%)   | 13 (0.9%)   | 0.02  |
| Metastatic cancer                                   | 9 (0.6%)     | 421 (1.0%)    | 0.05  | 9 (0.6%)    | 5 (0.4%)    | 0.03  |
| Solid tumor without metastasis                      | 19 (1.3%)    | 710 (1.7%)    | 0.03  | 19 (1.4%)   | 20 (1.4%)   | 0.01  |
| Rheumatoid arthritis/collagen vas                   | 32 (2.2%)    | 1336 (3.2%)   | 0.06  | 32 (2.3%)   | 31 (2.2%)   | <0.01 |
| Coagulopathy                                        | 200 (14.1%)  | 6469 (15.6%)  | 0.05  | 195 (14.0%) | 200 (14.4%) | 0.01  |
| Obesity                                             | 682 (47.9%)  | 16494 (39.7%) | 0.20  | 658 (47.3%) | 657 (47.3%) | <0.01 |
| Severe Obesity                                      | 409 (28.7%)  | 9094 (21.9%)  |       |             |             |       |
| BMI 30-39.9                                         | 299 (21.0%)  | 8050 (19.4%)  |       |             |             |       |
| BMI 40+                                             | 342 (24.0%)  | 7174 (17.3%)  |       |             |             |       |
| Other Obesity                                       | 278 (19.5%)  | 7561 (18.2%)  |       |             |             |       |
| Weight loss                                         | 102 (7.2%)   | 4183 (10.1%)  | 0.10  | 102 (7.3%)  | 100 (7.2%)  | 0.01  |
| Fluid and electrolyte disorders                     | 835 (58.7%)  | 26603 (64.1%) | 0.08  | 819 (58.9%) | 832 (59.9%) | 0.02  |
| Chronic blood loss anemia                           | 5 (0.4%)     | 268 (0.6%)    | 0.04  | 5 (0.4%)    | 7 (0.5%)    | 0.02  |
| Deficiency                                          | 343 (24.1%)  | 12602 (30.3%) | 0.12  | 334 (24.0%) | 344 (24.7%) | 0.02  |
| Anemias                                             |              |               |       |             |             |       |
| Alcohol abuse                                       | 51 (3.6%)    | 1675 (4.0%)   | 0.04  | 51 (3.7%)   | 51 (3.7%)   | 0     |
| Drug abuse                                          | 44 (3.1%)    | 1228 (3.0%)   | <0.01 | 42 (3.0%)   | 46 (3.3%)   | 0.02  |
| Psychoses                                           | 57 (4.0%)    | 2138 (5.1%)   | 0.06  | 57 (4.1%)   | 55 (4.0%)   | 0.01  |
| Depression                                          | 153 (10.8%)  | 4970 (12.0%)  | 0.01  | 149 (10.7%) | 156 (11.2%) | 0.02  |
| Hypertension                                        | 947 (66.5%)  | 30544 (73.5%) | 0.12  | 927 (66.7%) | 934 (67.2%) | 0.01  |
| <b>Co-treatments</b>                                |              |               |       |             |             |       |
| Neuromuscular blocking agent (within 2 days of IMV) | 1103 (77.5%) | 22237 (53.5%) |       |             |             |       |
| Benzodiazepine (within 2 days of IMV)               | 1171 (82.3%) | 28446 (68.5%) |       |             |             |       |

|                                              |                 |                  |      |                 |                 |       |
|----------------------------------------------|-----------------|------------------|------|-----------------|-----------------|-------|
| Remdesivir                                   | 536<br>(37.7%)  | 16057<br>(38.7%) | 0.04 | 518<br>(37.3%)  | 511<br>(36.8%)  | 0.01  |
| Dexamethasone                                | 838<br>(58.9%)  | 26636<br>(64.1%) | 0.06 | 819<br>(58.9%)  | 831<br>(59.8%)  | 0.02  |
| Convalescent<br>Plasma                       | 92 (6.5%)       | 2283<br>(5.5%)   | 0.05 | 91 (6.5%)       | 89 (6.4%)       | 0.01  |
| Tocilizumab                                  | 318<br>(22.3%)  | 5860<br>(14.1%)  | 0.22 | 306<br>(22.0%)  | 288<br>(20.7%)  | 0.03  |
| Baricitinib                                  | 3 (0.2%)        | 184 (0.4%)       | 0.02 | 3 (0.2%)        | 4 (0.3%)        | 0.01  |
| Vasopressors.<br>(within 2 days of<br>IMV)   | 716<br>(50.3%)  | 17980<br>(43.3%) | 0.14 | 697<br>(50.1%)  | 687<br>(49.4%)  | 0.01  |
| Other Sedatives<br>(within 2 days of<br>IMV) | 1422<br>(99.9%) | 38908<br>(93.7%) | 0.34 | 1389<br>(99.9%) | 1330<br>(95.7%) | 0.25  |
| Methadone<br>(during stay)                   | 71 (5.0%)       | 579 (1.4%)       | 0.17 | 65 (4.7%)       | 64 (4.6%)       | <0.01 |
| Gabapentinoids.<br>(during stay)             | 257<br>(18.1%)  | 5415<br>(13.0%)  | 0.12 | 249<br>(17.9%)  | 245<br>(17.6%)  | 0.01  |

---

IQR = Interquartile range, IMV = Invasive mechanical ventilation,

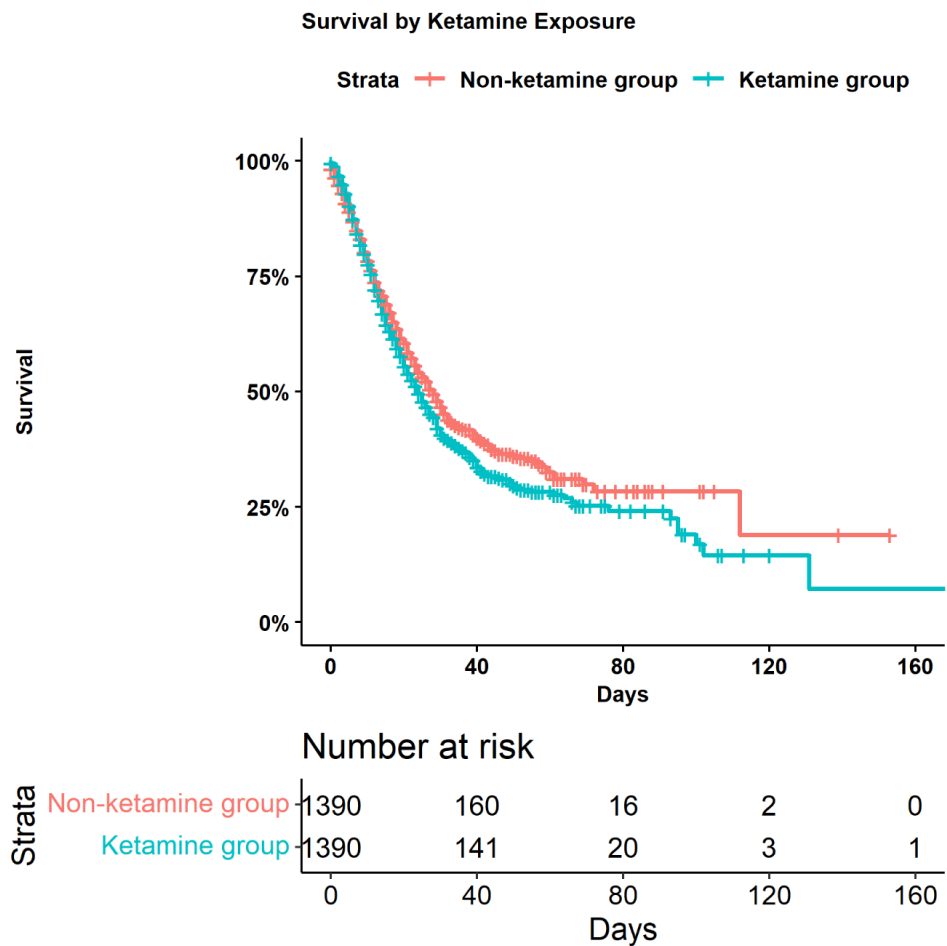

**Supplemental Figure 1 Survival Curves (% patient alive each day after day 2)**



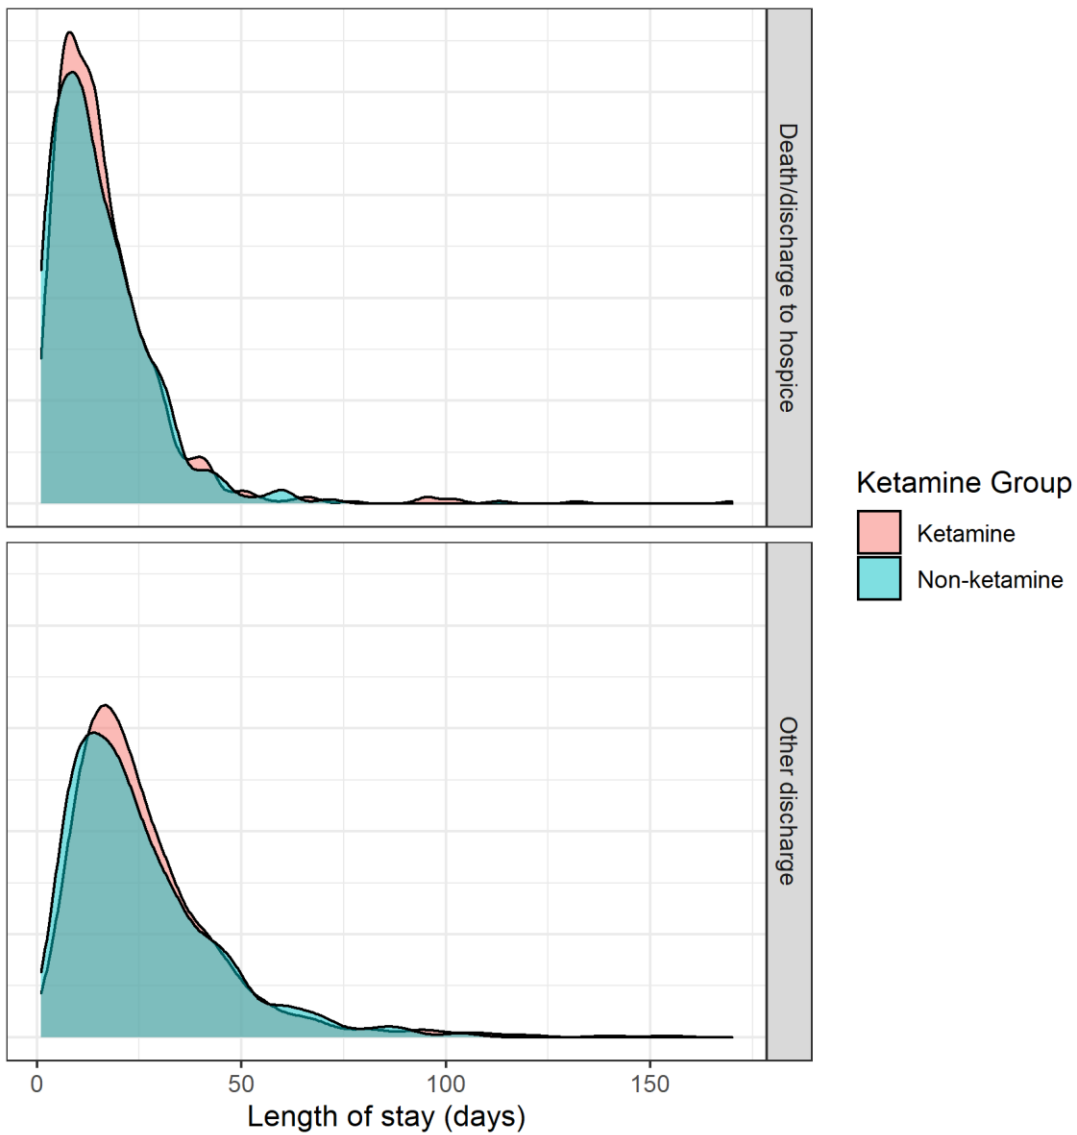

**Supplemental Figure 2 Length of Stay Among Survivors and Non-survivors**
